# Supplementary material for: Scavenger receptors target glycolipids for natural killer T cell activation
Source: JCI journal article supplement (doi:10.1172/jci62267), 2012-10-15
Supplement: sd1 [file 1]

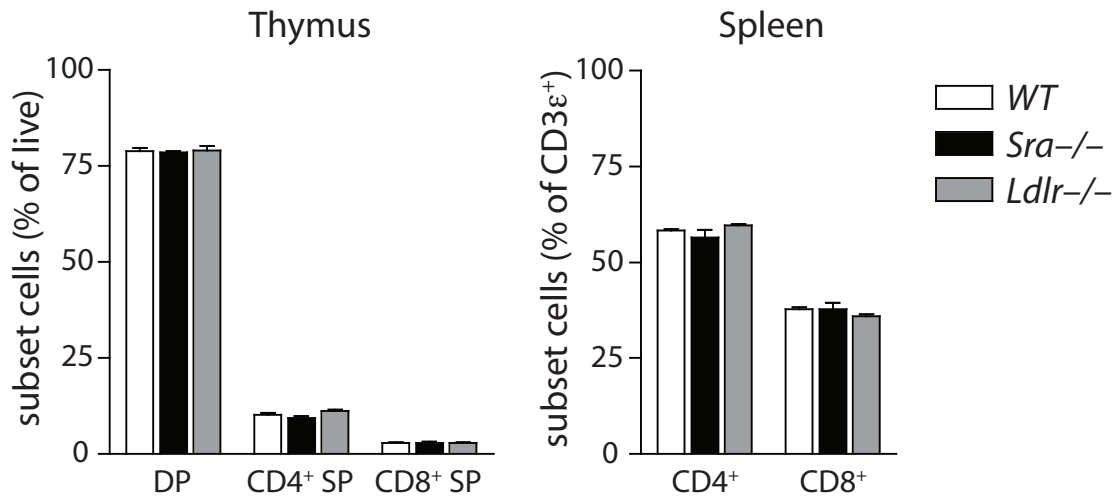

**Supplemental Figure 1** Normal populations of conventional T cells in *SRA*<sup>-/-</sup> and *LDLR*<sup>-/-</sup> mice. Thymic and splenic lymphocytes of indicated mouse strains were characterized by flow cytometry after staining with specific antibodies for CD3, CD4 and CD8. Bar graphs depict the mean  $\pm$ SEM for groups of 4-6 mice from one of 2 independent experiments.

Freigang *et al.*, 2012

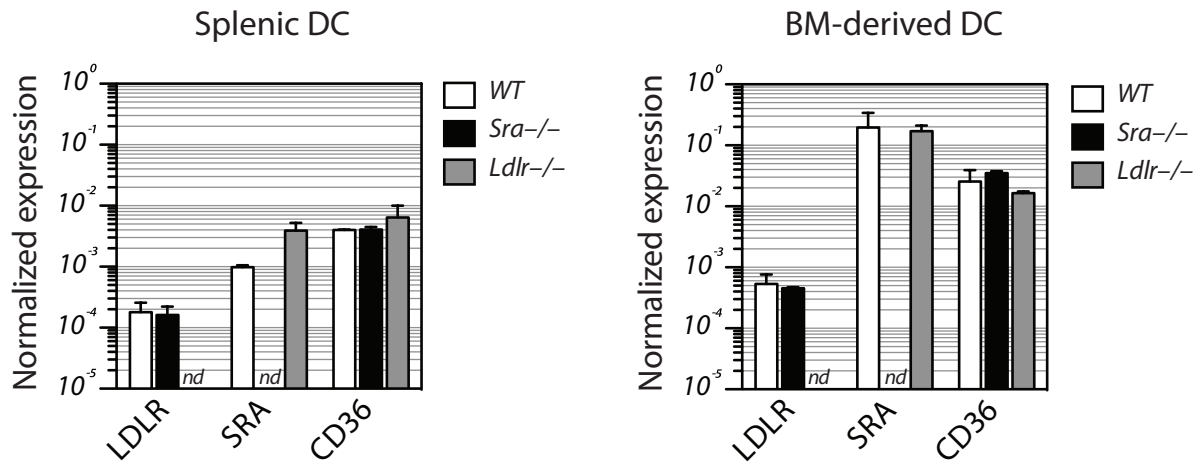

**Supplemental Figure 2** Expression levels of lipid antigen receptors in APCs of *SRA*<sup>-/-</sup> and *LDLR*<sup>-/-</sup> mice. cDNA generated from ex vivo sorted splenic DCs and from in vitro generated BM-derived DCs was analyzed by quantitative PCR to compare the expression levels of LDLR, SRA and CD36. Values were normalized to  $\beta$ -actin expression. Bars represent the mean  $\pm$ SEM for triplicate determinations from one of 2 independent experiments.
